# Supplementary material for: Organic pollutants in water-soluble cavitands and capsules: contortions of molecules in nanospace
Source: Royal Society of Chemistry journal article supplement (doi:10.1039/d2qo00139j), 2022-01-01
Supplement: d2qo00139j1.pdf [file d2qo00139j1.pdf]

## Organic pollutants in water-soluble cavitands and capsules: contortions of molecules in nanospace

Rongzu Liang<sup>‡a</sup>, Dongdong Bu<sup>‡a</sup>, Xiaoshi Su<sup>‡a</sup>, Xin Wei<sup>a</sup>, Edvinas Orentas<sup>b,c</sup>, Julius Rebek, Jr.<sup>d</sup>, Qixun Shi<sup>\*a</sup>

<sup>a</sup>Institute of Advanced Synthesis, School of Chemistry and Molecular Engineering, Jiangsu National Synergetic Innovation Center for Advanced Materials, Nanjing Tech University, Nanjing 211816, China. Email: ias\_qxshi@njtech.edu.cn

<sup>b</sup>Department of Organic Chemistry, Vilnius University, Naugarduko 24, LT-03225, Vilnius, Lithuania

<sup>c</sup>Department of Nanoengineering, Center for Physical Sciences and Technology, Savanorių 231, LT-02300 Vilnius, Lithuania

<sup>d</sup>Skaggs Institute for Chemical Biology and Department of Chemistry, The Scripps Research Institute, La Jolla, CA 92037, United States

‡ These authors contributed equally to this work.

Electronic Supplementary Information

**Table S1.**  $\Delta\delta$  data of  $C_8H_{17}OH$ - $C_{10}H_{21}OH$  in cavitand **1**<sup>a</sup>

| $\Delta\delta$ | $C_8H_{17}OH$ | $C_9H_{19}OH$ | $C_{10}H_{21}OH$ |
|----------------|---------------|---------------|------------------|
| 1/(Me)         | -4.76         | -4.75         | -4.73            |
| 2              | -4.47         | -4.48         | -4.44            |
| 3              | -3.63         | -3.65         | -3.64            |
| 4              | -2.73         | -2.78         | -2.8             |
| 5              | -1.62         | -1.7          | -1.74            |
| 6              | -0.85         | -0.93         | -0.98            |
| 7              | -0.39         | -0.4          | -0.45            |
| 8              | -0.16         | -0.17         | -0.19            |
| 9              |               | -0.05         | -0.04            |
| 10             |               |               | 0.1              |

<sup>a</sup>  $\Delta\delta = \delta_{\text{bound guest}} - \delta_{\text{free guest}}$

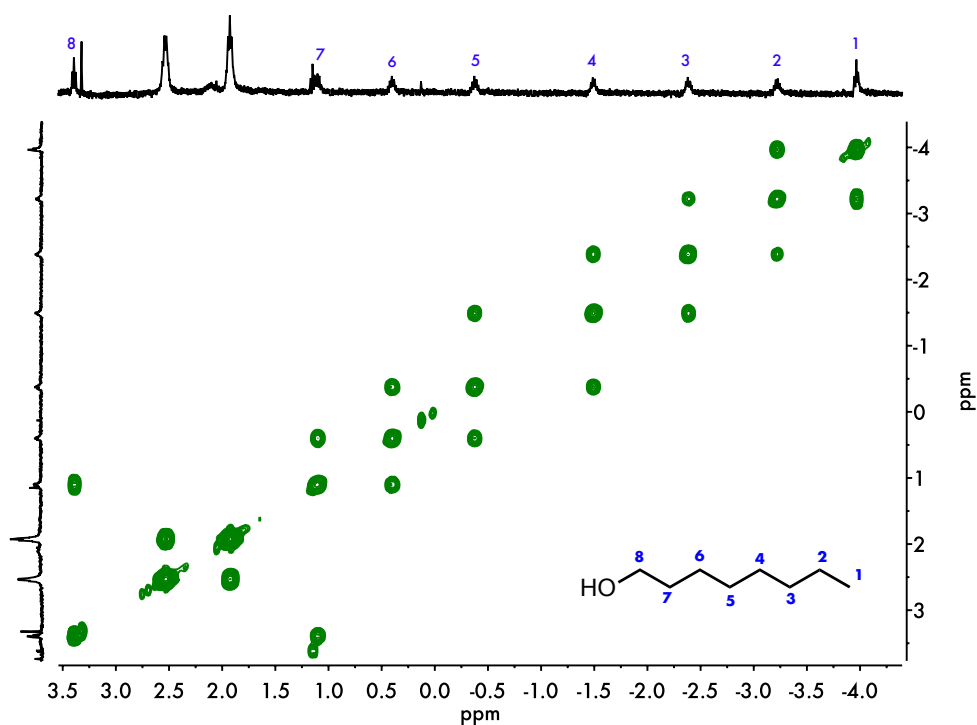

**Figure S1.** Partial COSY NMR spectrum (400 MHz, D<sub>2</sub>O, 298K) of *n*-C<sub>8</sub>H<sub>17</sub>OH in cavitand **1**.

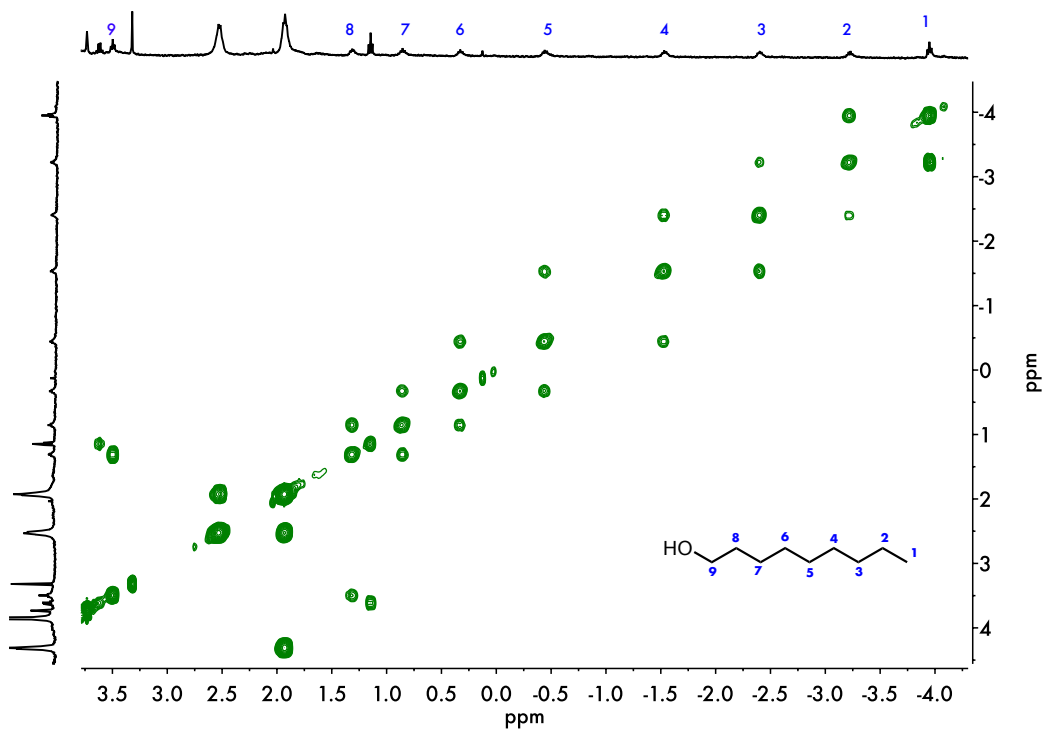

Figure S2. Partial COSY NMR spectrum (400 MHz, D<sub>2</sub>O, 298K) of *n*-C<sub>9</sub>H<sub>19</sub>OH in cavitan 1.

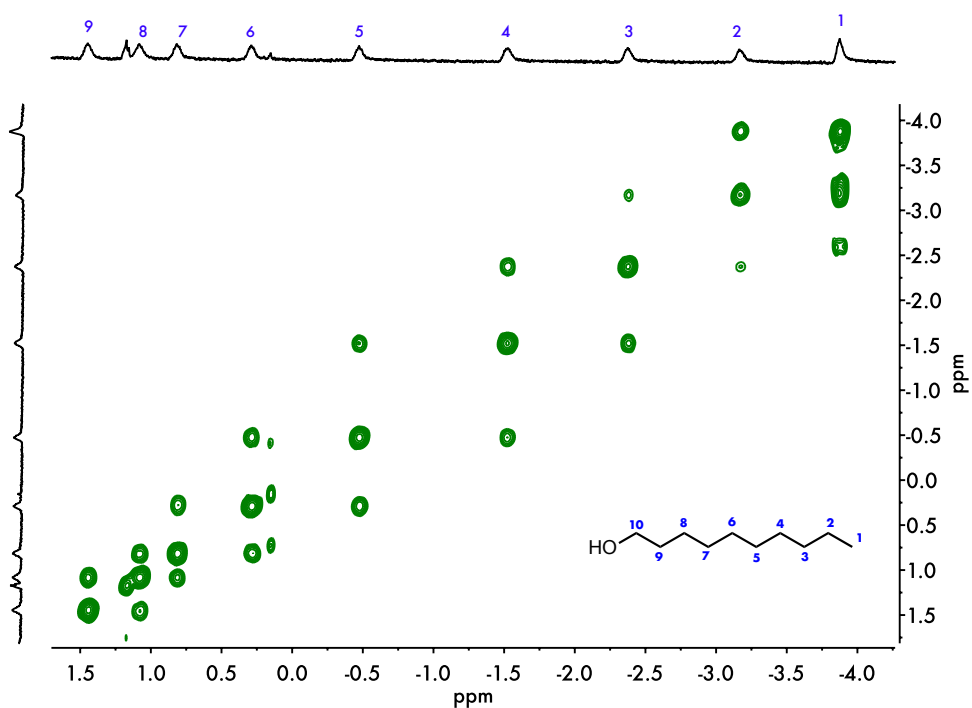

Figure S3. Partial COSY NMR spectrum (400 MHz, D<sub>2</sub>O, 298K) of *n*-C<sub>10</sub>H<sub>21</sub>OH in cavitan 1.

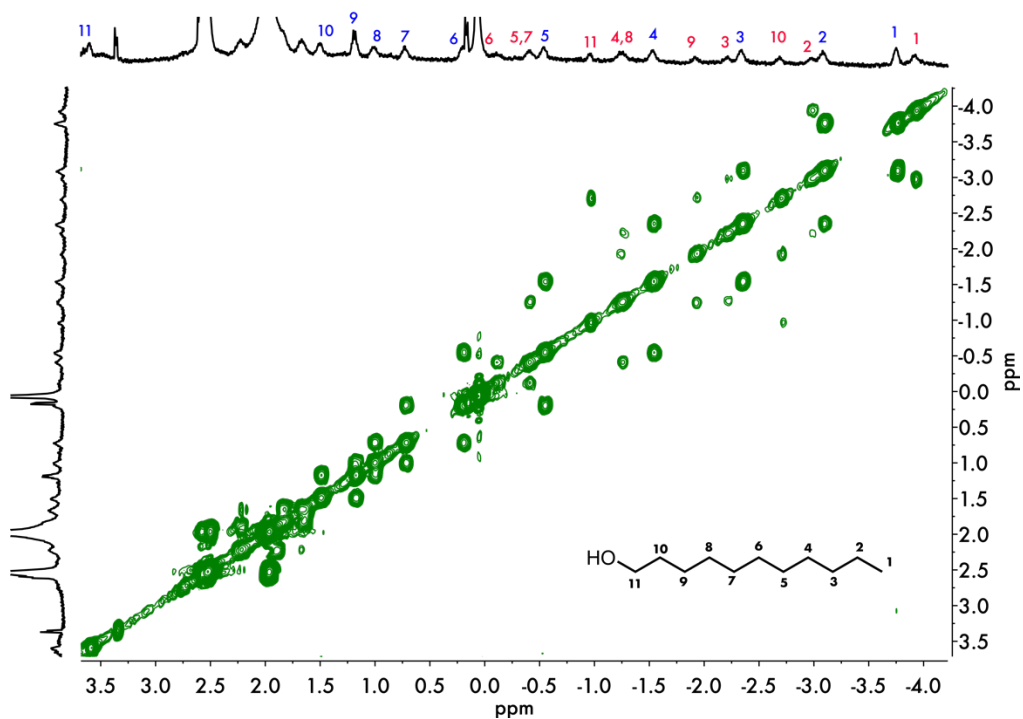

**Figure S4.** Partial COSY NMR spectrum (400 MHz, D<sub>2</sub>O, 298K) of *n*-C<sub>11</sub>H<sub>23</sub>OH in both cavitant **1** (the guest with blue labeled numbers) and capsule **1.1** (the guest with red labeled numbers).

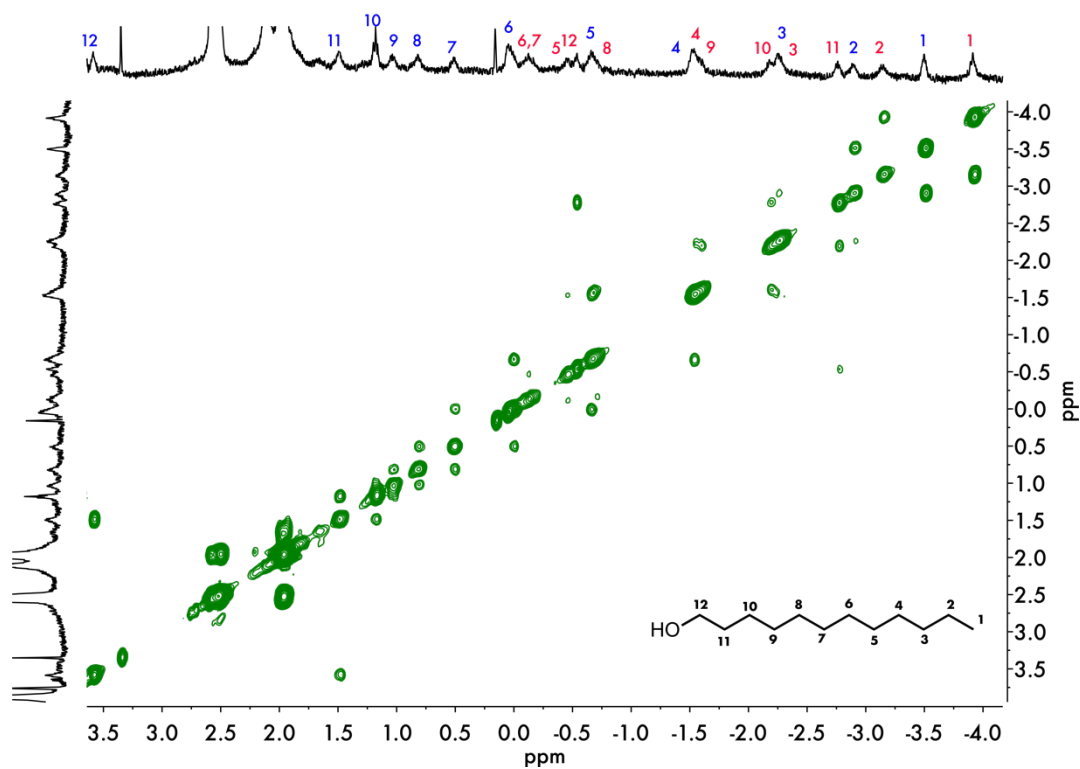

**Figure S5.** Partial COSY NMR spectrum (400 MHz, D<sub>2</sub>O, 298K) of *n*-C<sub>12</sub>H<sub>25</sub>OH in both cavitant **1** (the guest with blue labeled numbers) and capsule **1.1** (the guest with red labeled numbers).

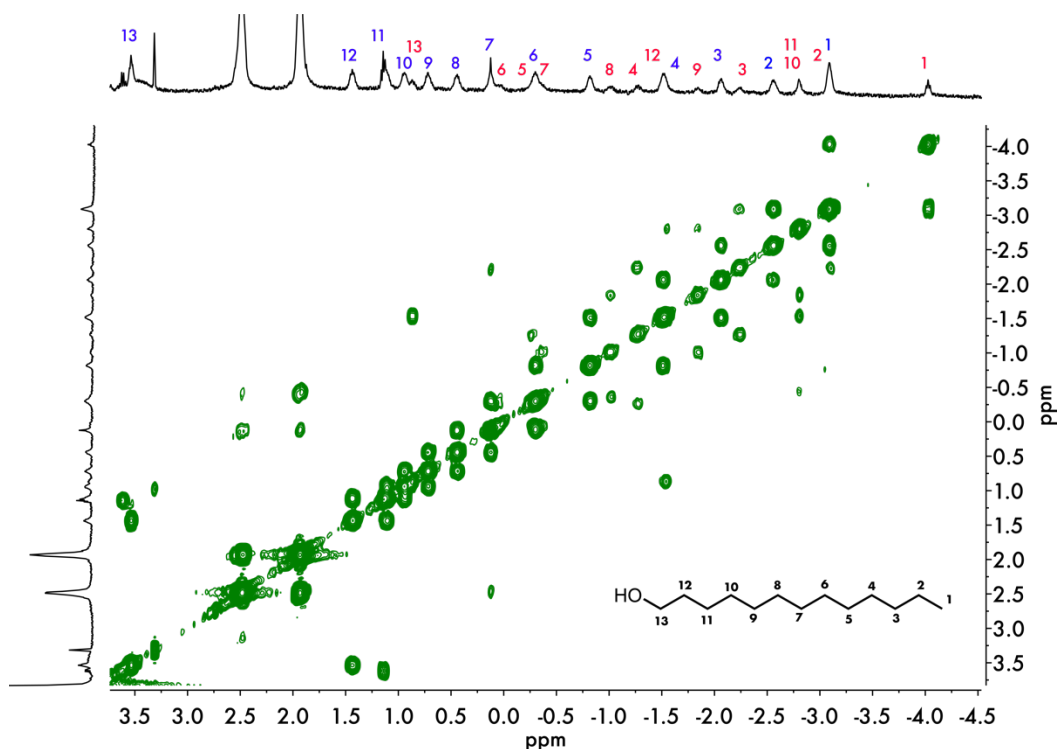

**Figure S6.** Partial COSY NMR spectrum (400 MHz, D<sub>2</sub>O, 298K) of *n*-C<sub>13</sub>H<sub>27</sub>OH in both cavitaand **1** (the guest with blue labeled numbers) and capsule **1.1** (the guest with red labeled numbers).

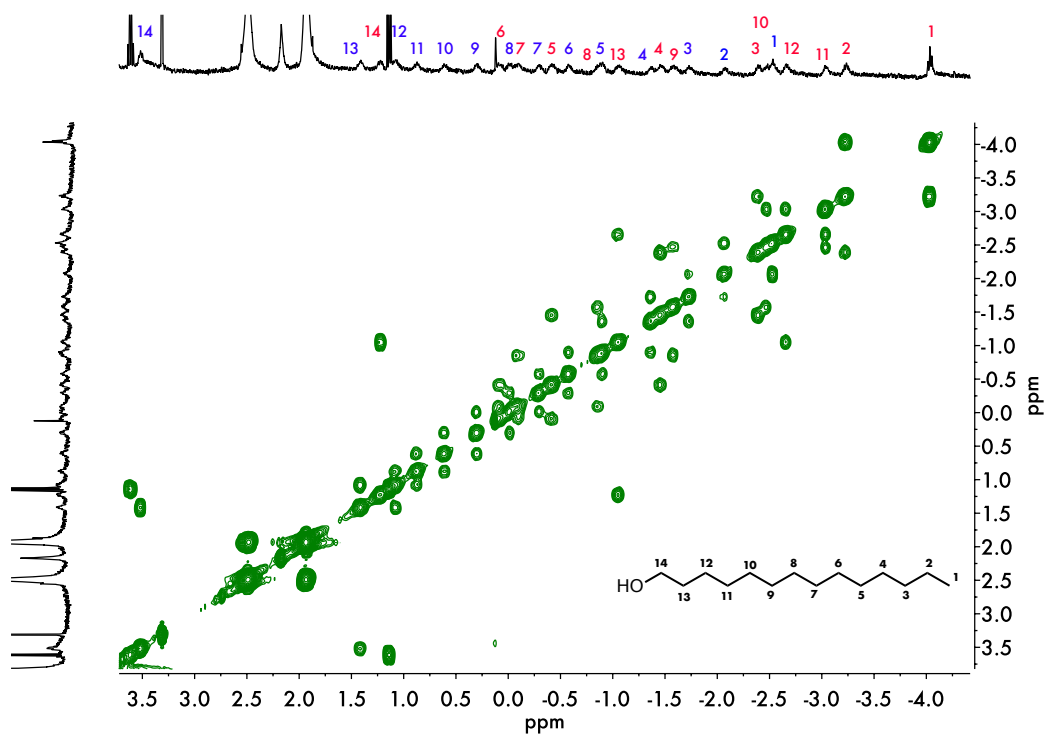

**Figure S7.** Partial COSY NMR spectrum (400 MHz, D<sub>2</sub>O, 298K) of *n*-C<sub>14</sub>H<sub>29</sub>OH in both cavitaand **1** (the guest with blue labeled numbers) and capsule **1.1** (the guest with red labeled numbers).

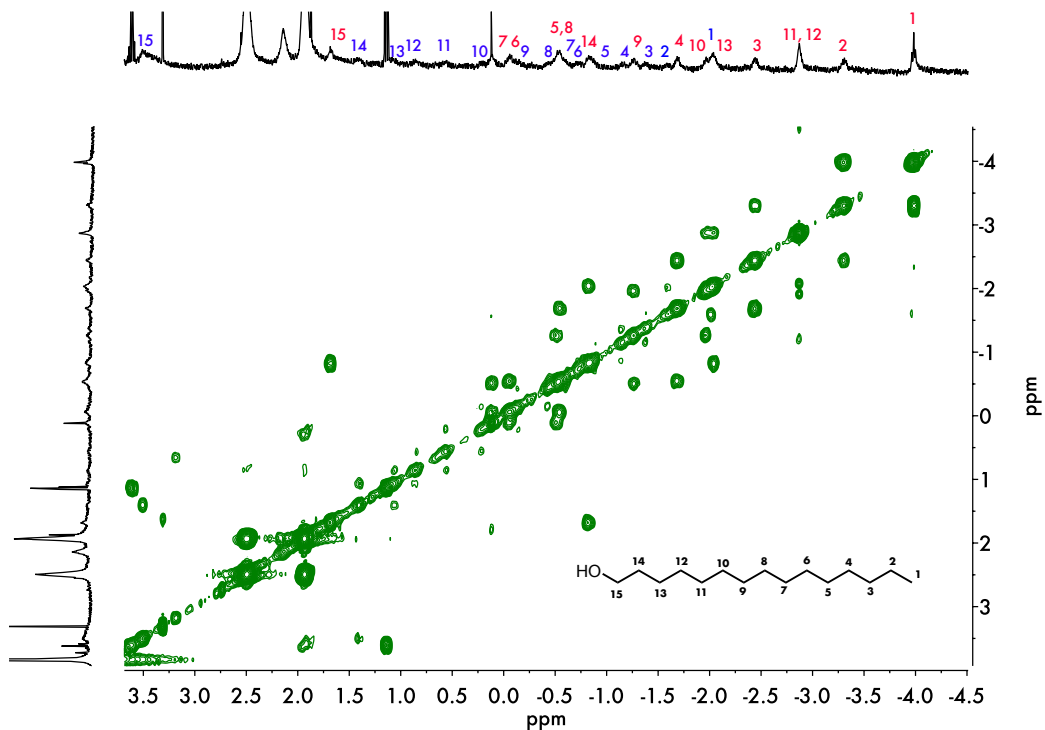

**Figure S8.** Partial COSY NMR spectrum (400 MHz,  $\text{D}_2\text{O}$ , 298K) of  $n\text{-C}_{15}\text{H}_{31}\text{OH}$  in both cavitanol **1** (the guest with blue labeled numbers) and capsule **1.1** (the guest with red labeled numbers).

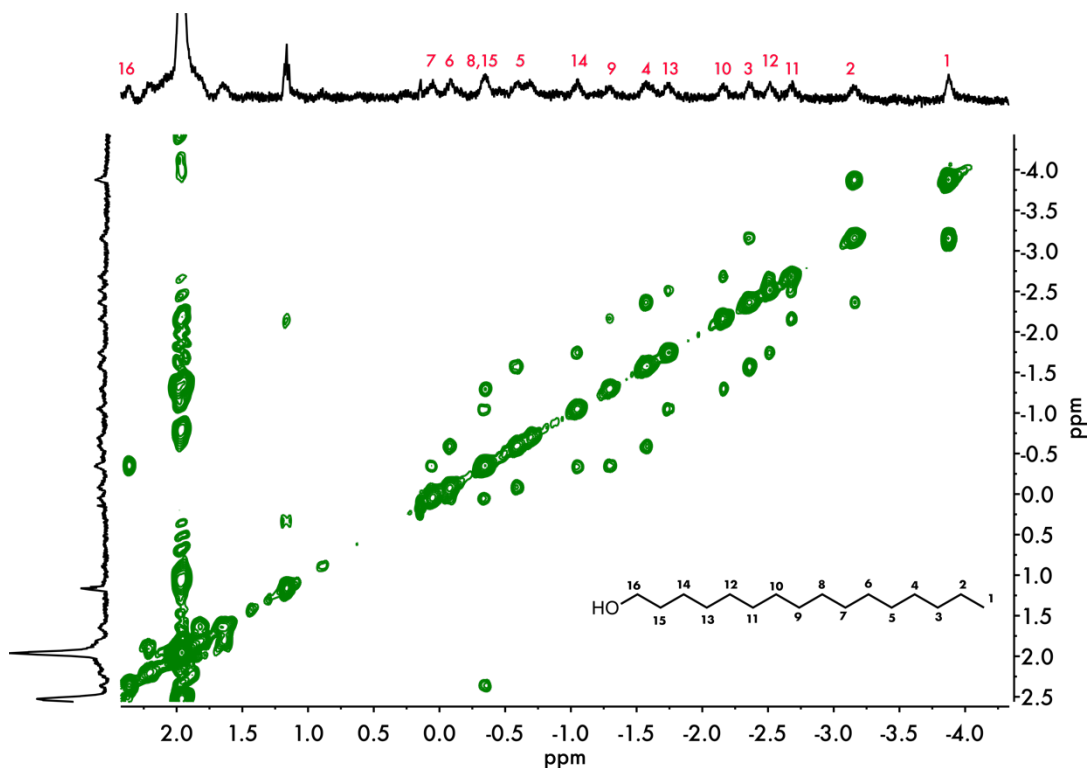

**Figure S9.** Partial COSY NMR spectrum (400 MHz,  $\text{D}_2\text{O}$ , 298K) of  $n\text{-C}_{16}\text{H}_{33}\text{OH}$  in capsule **1.1**.

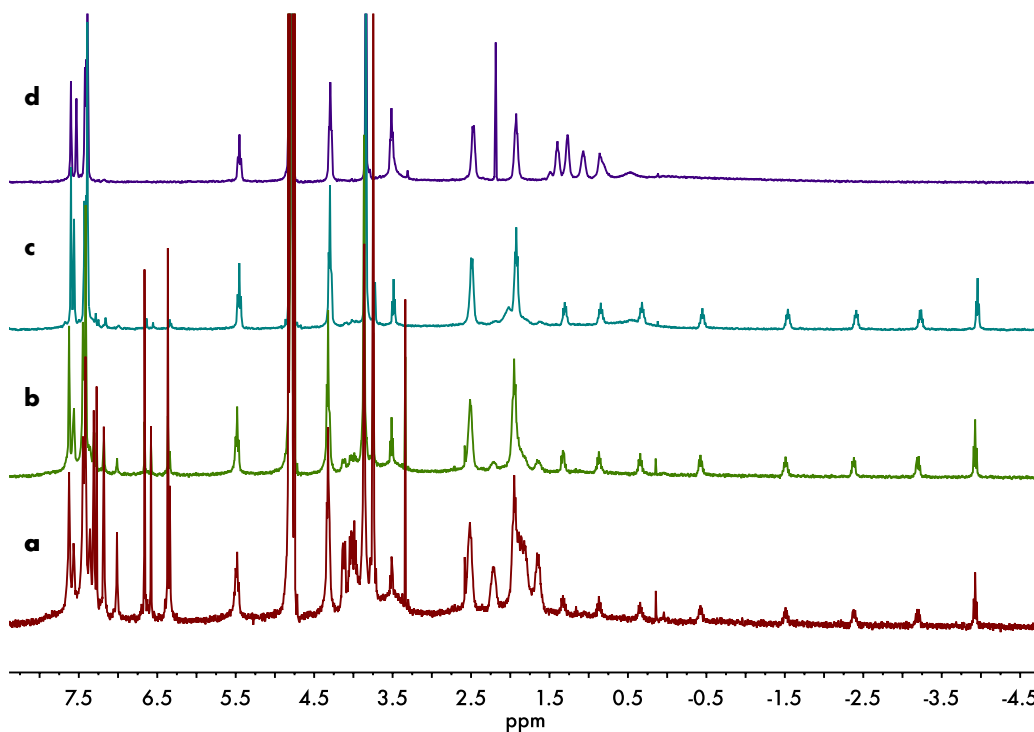

**Figure S10.** Stacked partial  $^1\text{H}$  NMR spectra (400 MHz,  $\text{D}_2\text{O}$ , 298K) of different equivalents of  $n\text{-C}_9\text{H}_{19}\text{OH}$  in cavitaud **1**. a) 0.2 equivalent; b) 0.5 equivalent; c) 1.0 equivalent and d) 4.0 equivalent.

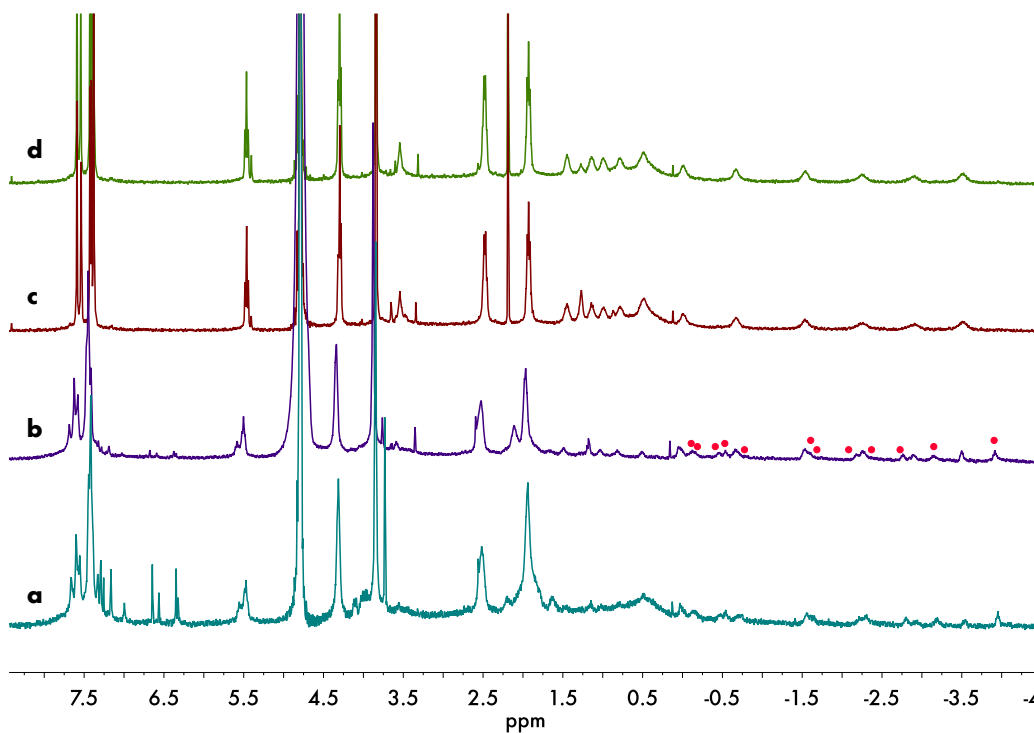

**Figure S11.** Stacked partial  $^1\text{H}$  NMR spectra (400 MHz,  $\text{D}_2\text{O}$ , 298K) of host-guest complex between different equivalents of  $n\text{-C}_{12}\text{H}_{25}\text{OH}$  and cavitaud **1**. a) 0.2 equivalent; b) 0.5 equivalent; c) 1.0 equivalent and d) 4.0 equivalent. The NMR signals labeled with red circle are from the guest inside the capsule **1.1**.

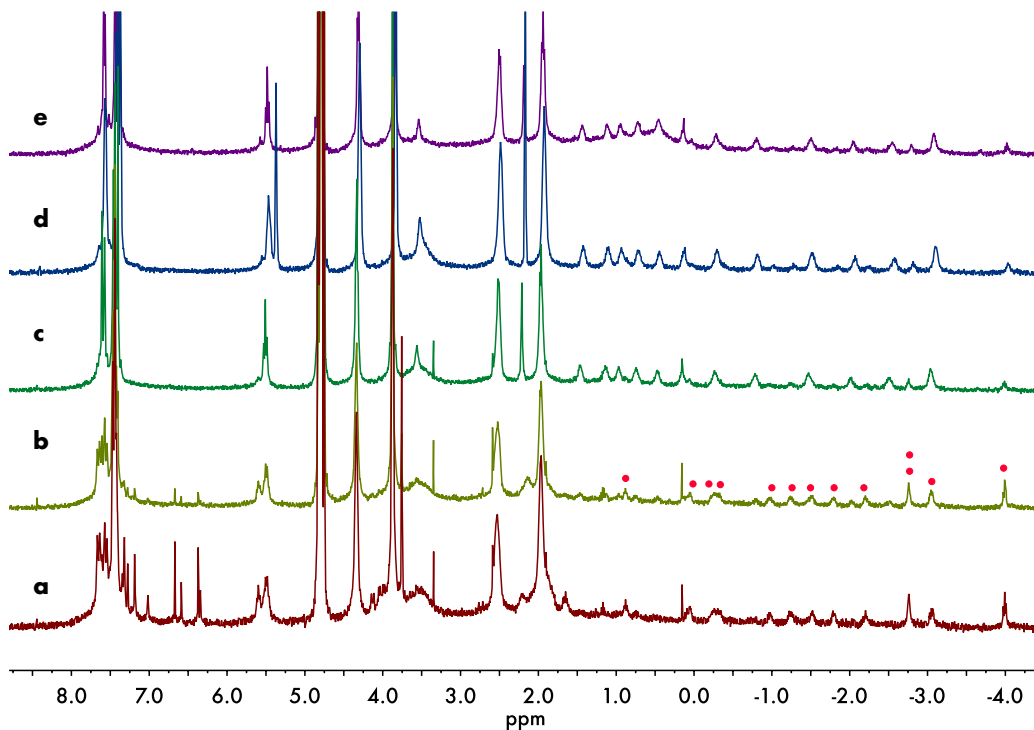

**Figure S12.** Stacked partial <sup>1</sup>H NMR spectra (400 MHz, D<sub>2</sub>O, 298K) of host-guest complex between different equivalents of *n*-C<sub>13</sub>H<sub>27</sub>OH and cavitanol **1.1**. a) 0.3 equivalent; b) 0.4 equivalent; c) 1.0 equivalent; d) 3.0 equivalent and e) 10.0 equivalent. The NMR signals labeled with red circle are from the guest inside the capsule **1.1**.

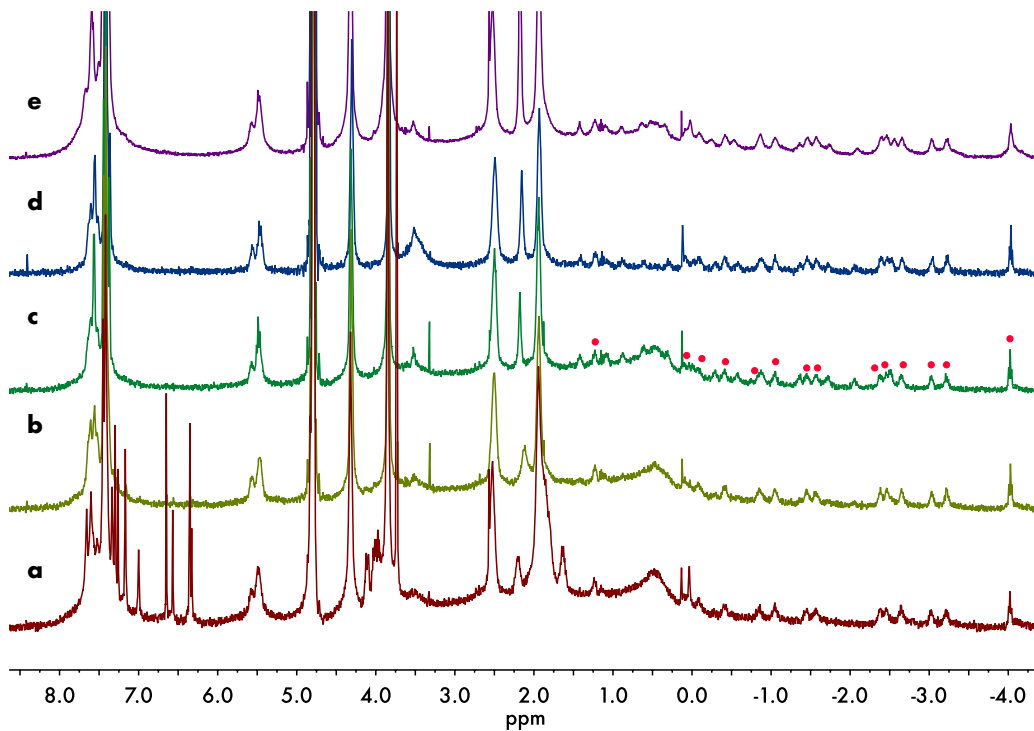

**Figure S13.** Stacked partial <sup>1</sup>H NMR spectra (400 MHz, D<sub>2</sub>O, 298K) of host-guest complex between different equivalents of *n*-C<sub>14</sub>H<sub>29</sub>OH and cavitanol **1.1**. a) 0.5 equivalent; b) 1.0 equivalent; c) 2.0 equivalent; d) 4.0 equivalent and e) 10.0 equivalent. The NMR signals labeled with red circle are from the guest inside the capsule **1.1**.



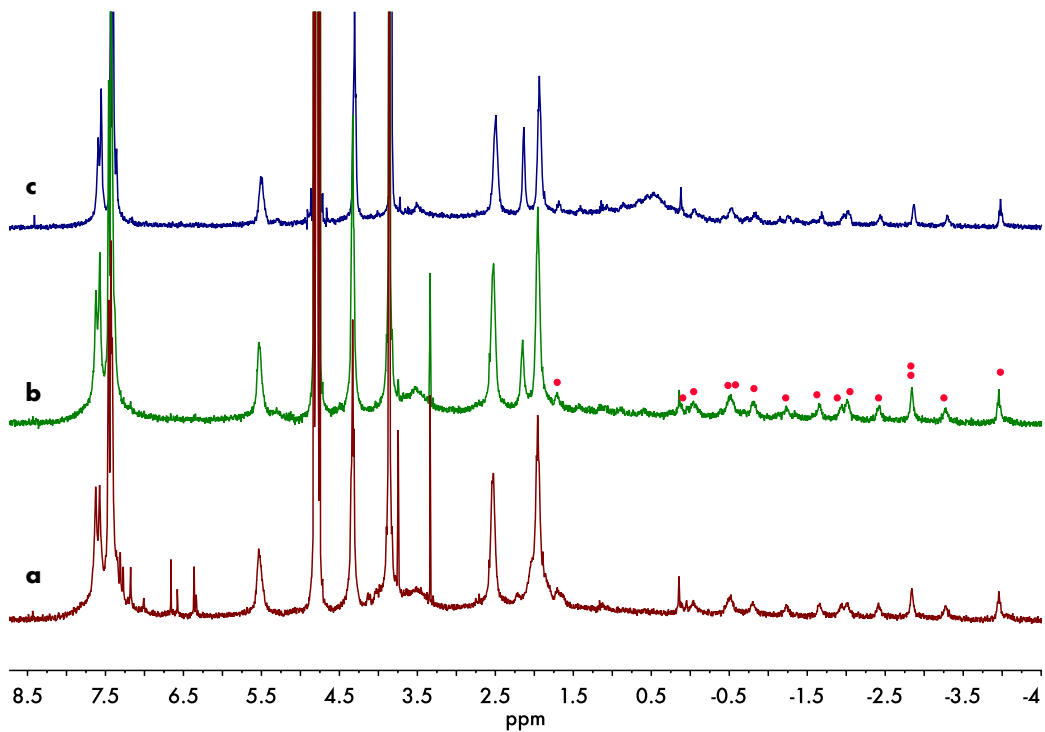

**Figure S14.** Stacked partial  $^1\text{H}$  NMR spectra (400 MHz,  $\text{D}_2\text{O}$ , 298K) of host-guest complex between different equivalents of  $n\text{-C}_{15}\text{H}_{31}\text{OH}$  and cavitaud **1**. a) 0.5 equivalent; b) 1.0 equivalent and c) 4.0 equivalent. The NMR signals labeled with red circle are from the guest inside the capsule **1.1**.

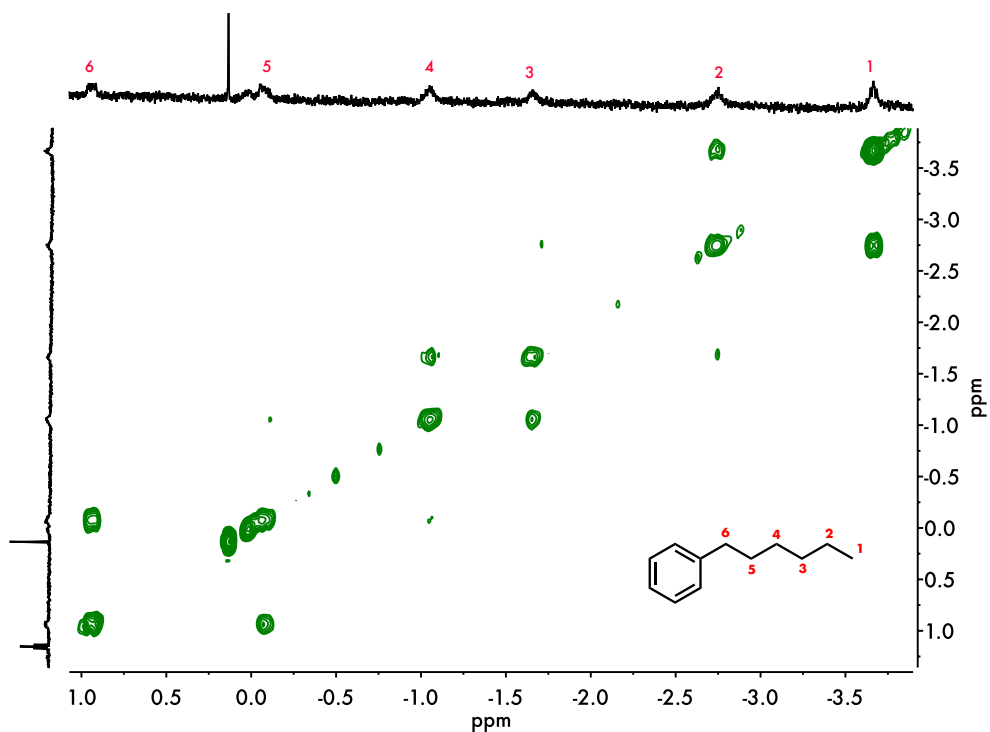

**Figure S15.** Partial COSY NMR spectrum (400 MHz,  $\text{D}_2\text{O}$ , 298K) of  $\text{C}_6\text{H}_{13}\text{Ph}$  in capsule **1.1**.

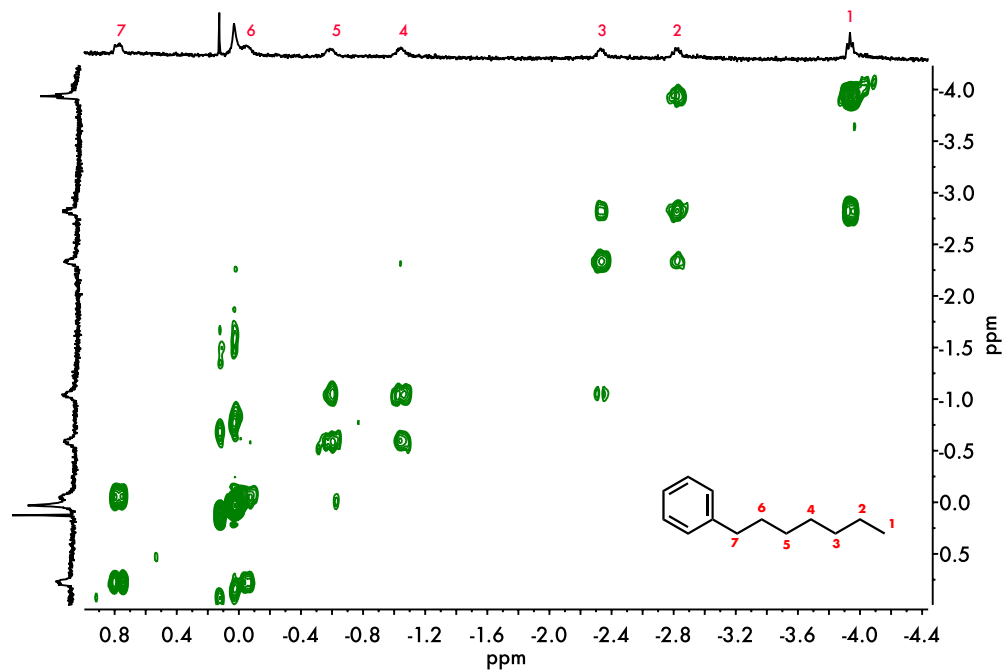

**Figure S16.** Partial COSY NMR spectrum (400 MHz, D<sub>2</sub>O, 298K) of C<sub>7</sub>H<sub>15</sub>Ph in capsule 1.1.

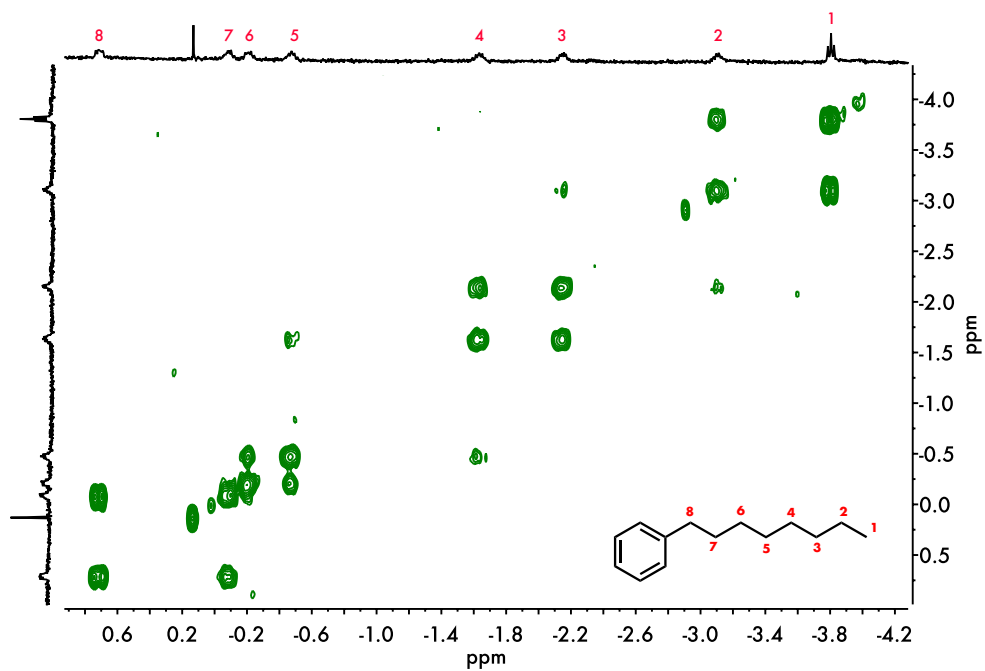

**Figure S17.** Partial COSY NMR spectrum (400 MHz, D<sub>2</sub>O, 298K) of C<sub>8</sub>H<sub>17</sub>Ph in capsule 1.1.

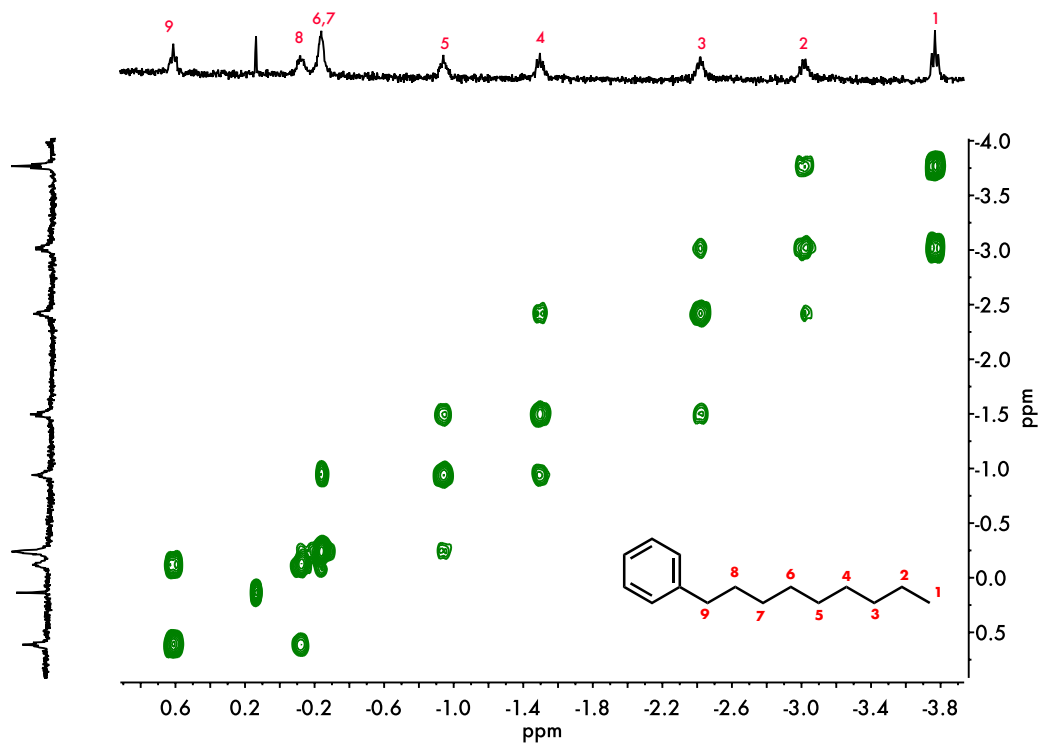

Figure S18. Partial COSY NMR spectrum (400 MHz, D<sub>2</sub>O, 298K) of C<sub>9</sub>H<sub>19</sub>Ph in capsule 1.1.

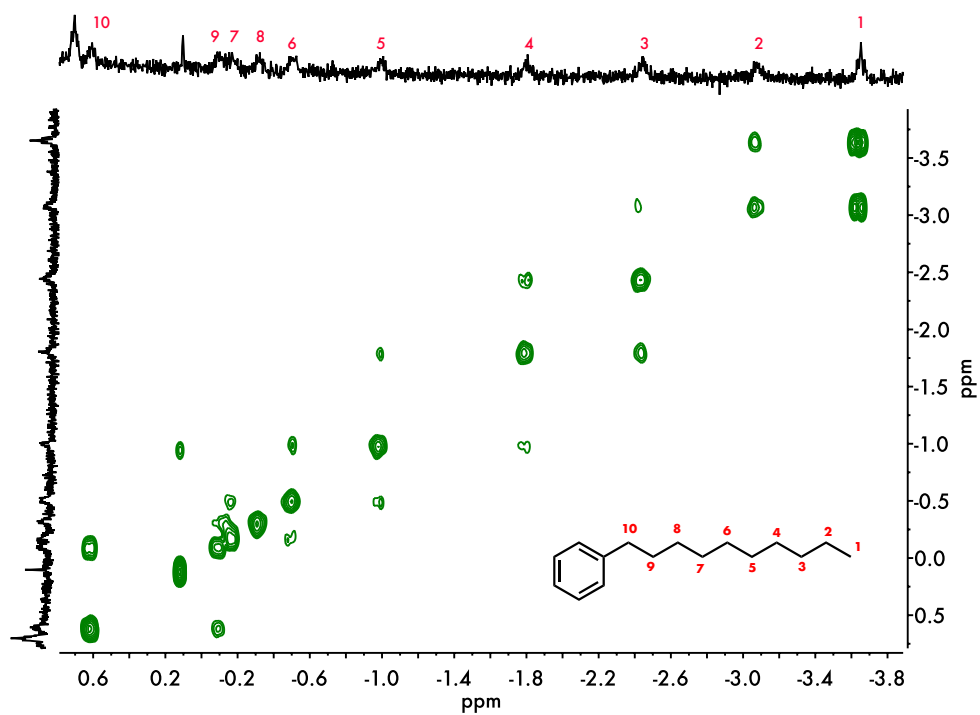

Figure S19. Partial COSY NMR spectrum (400 MHz, D<sub>2</sub>O, 298K) of C<sub>10</sub>H<sub>21</sub>Ph in capsule 1.1.

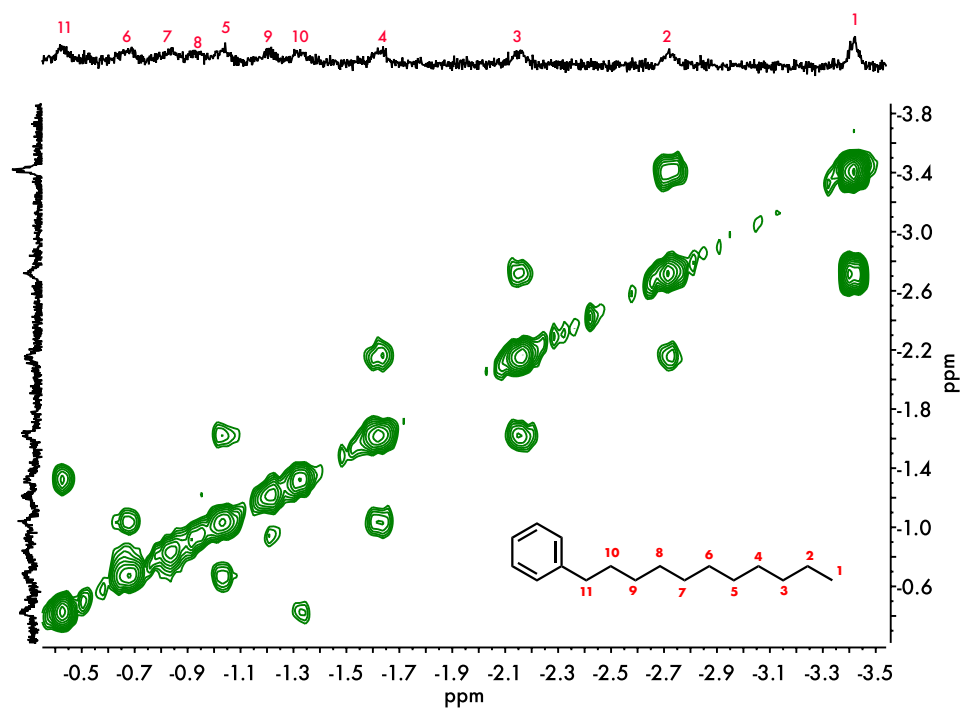

Figure S20. Partial COSY NMR spectrum (400 MHz, D<sub>2</sub>O, 298K) of C<sub>11</sub>H<sub>23</sub>Ph in capsule 1.1.

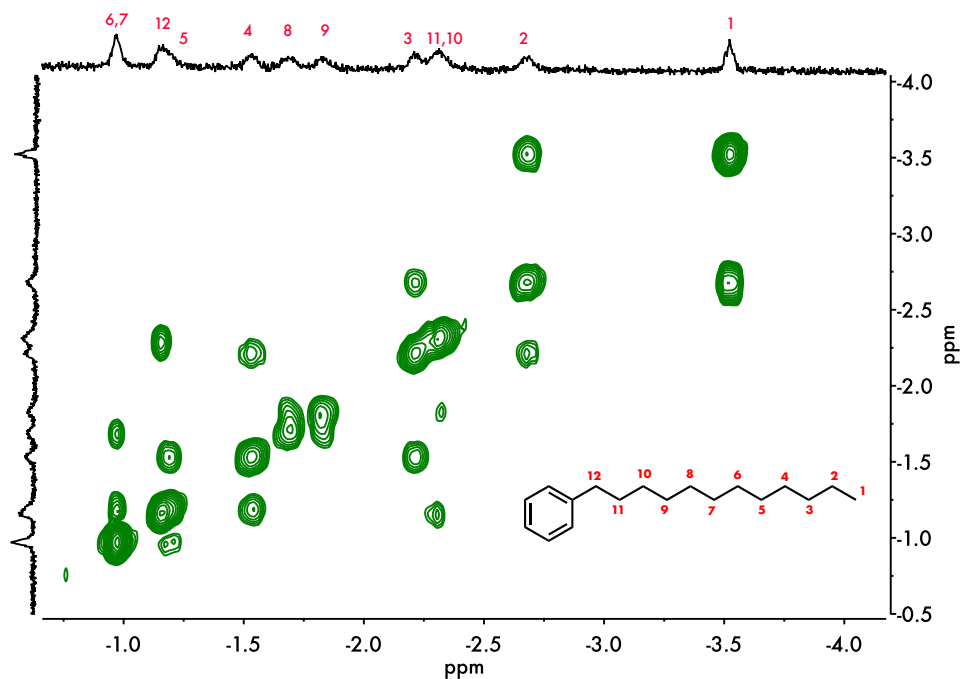

Figure S21. Partial COSY NMR spectrum (400 MHz, D<sub>2</sub>O, 298K) of C<sub>12</sub>H<sub>25</sub>Ph in capsule 1.1.

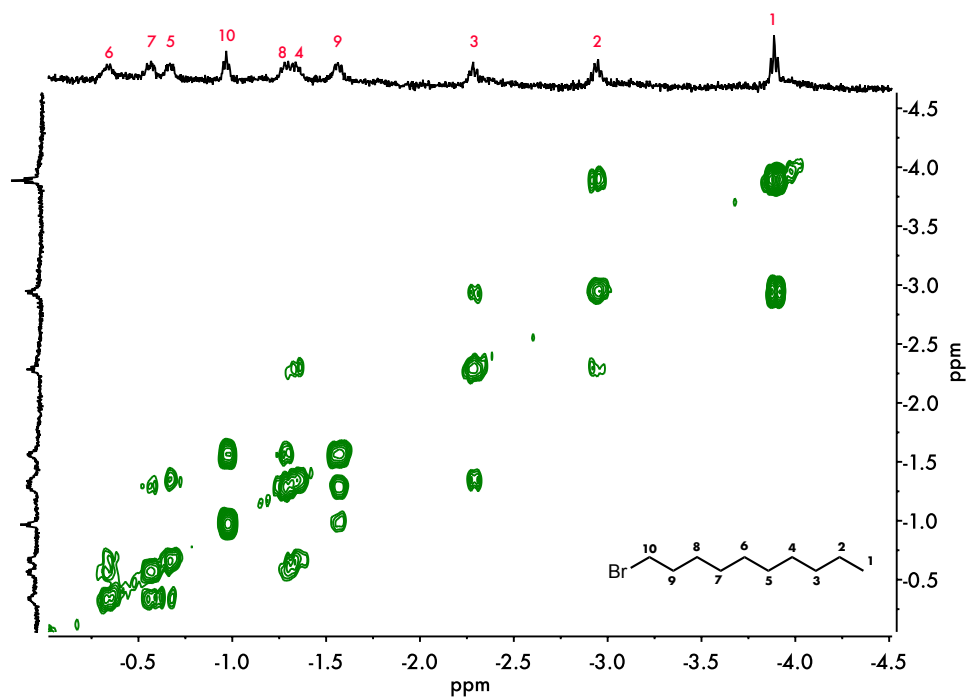

Figure S22. Partial COSY NMR spectrum (400 MHz, D<sub>2</sub>O, 298K) of C<sub>10</sub>H<sub>21</sub>Br in capsule 1.1.

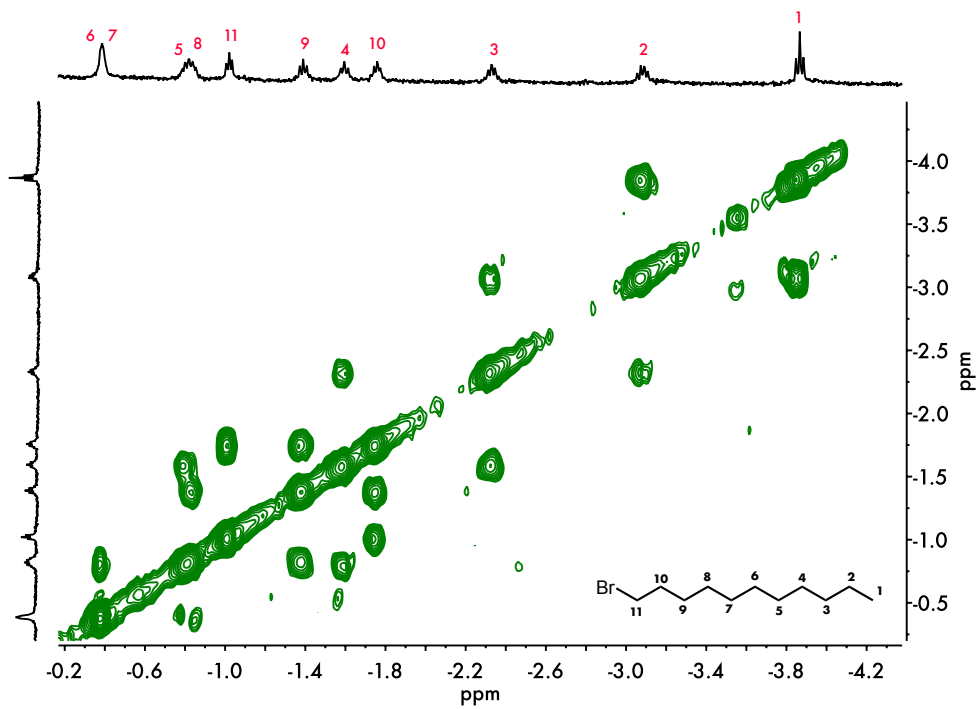

Figure S23. Partial COSY NMR spectrum (400 MHz, D<sub>2</sub>O, 298K) of C<sub>11</sub>H<sub>23</sub>Br in capsule 1.1.

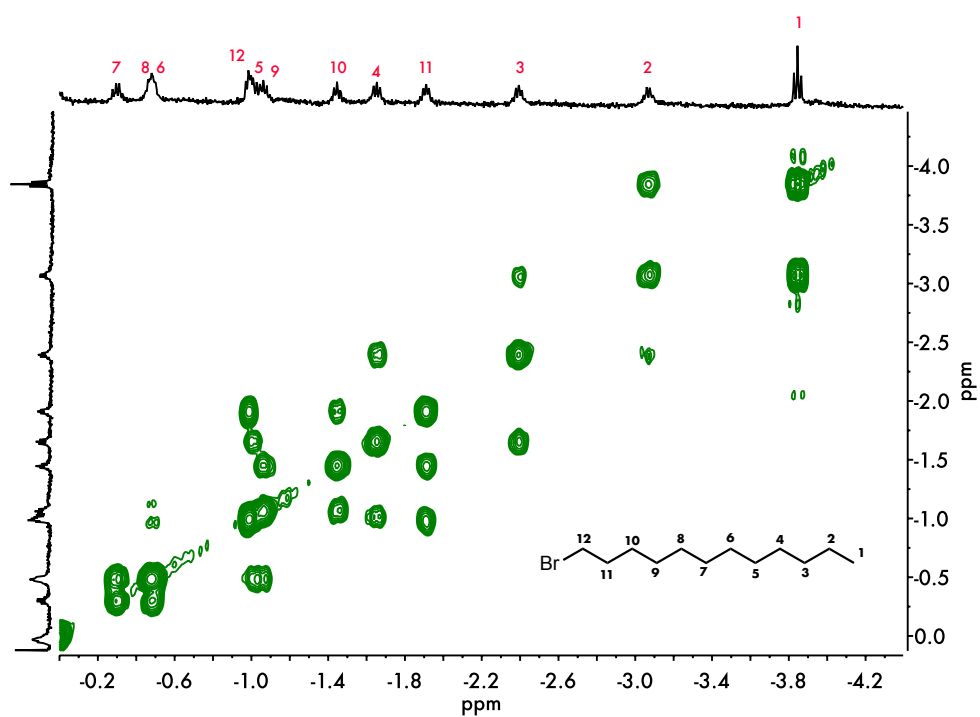

**Figure S24.** Partial COSY NMR spectrum (400 MHz, D<sub>2</sub>O, 298K) of C<sub>12</sub>H<sub>25</sub>Br in capsule **1.1**.

**Table S2.**  $\Delta\delta$  data of C<sub>10</sub>H<sub>21</sub>Br-C<sub>12</sub>H<sub>25</sub>Br in capsule **1.1**<sup>a</sup>

| $\Delta\delta$ | C <sub>10</sub> H <sub>21</sub> Br | C <sub>11</sub> H <sub>23</sub> Br | C <sub>12</sub> H <sub>25</sub> Br |
|----------------|------------------------------------|------------------------------------|------------------------------------|
| 1/(Me)         | -4.78                              | -4.74                              | -4.73                              |
| 2              | -4.25                              | -4.36                              | -4.37                              |
| 3              | -3.58                              | -3.62                              | -3.70                              |
| 4              | -2.64                              | -2.89                              | -2.95                              |
| 5              | -1.97                              | -2.10                              | -2.32                              |
| 6              | -1.64                              | -1.69                              | -1.79                              |
| 7              | -1.87                              | -1.69                              | -1.61                              |
| 8              | -2.73                              | -2.13                              | -1.79                              |
| 9              | -3.40                              | -2.82                              | -2.37                              |
| 10             | -4.31                              | -3.58                              | -2.88                              |
| 11             |                                    | -4.35                              | -3.74                              |
| 12             |                                    |                                    | -4.33                              |

<sup>a</sup>  $\Delta\delta = \delta_{\text{bound guest}} - \delta_{\text{free guest}}$

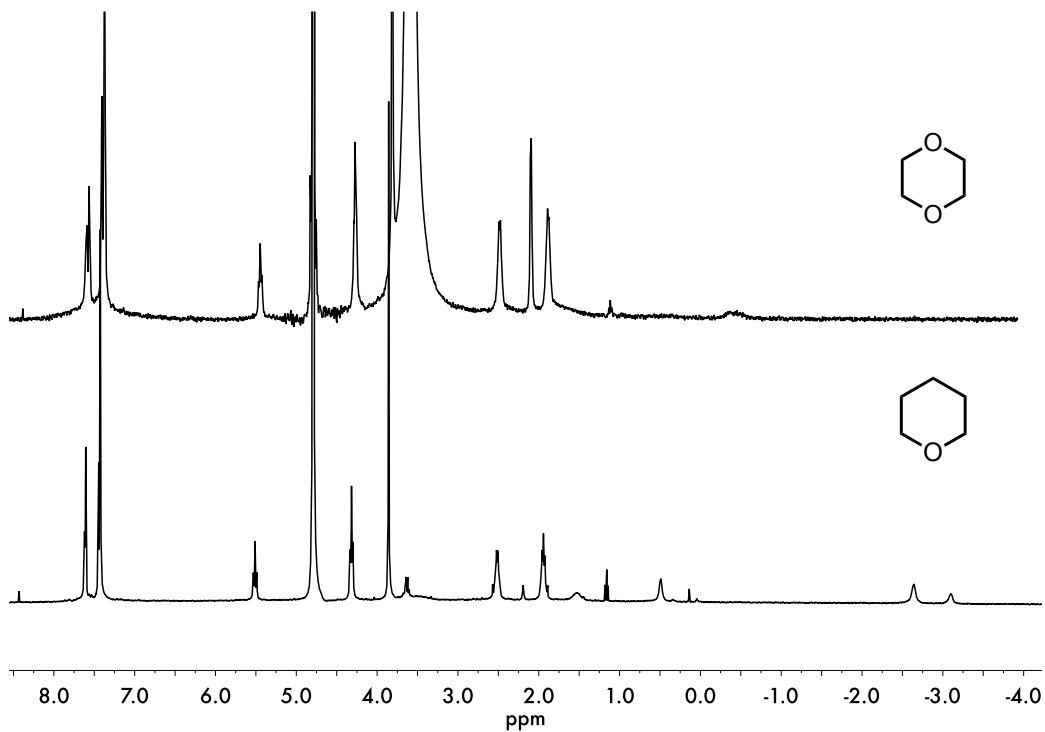

**Figure S25.** Stacked <sup>1</sup>H NMR spectra (400 MHz, D<sub>2</sub>O, 298K) of 1,4-dioxane (top) and tetrahydropyran (bottom) in cavitaand **1**.

**Table S3.**  $\Delta\delta$  data of tetrahydropyran and 1,4-dioxane in cavitaand **1**<sup>a</sup>

| $\Delta\delta$ | Tetrahydropyran | 1,4-Dioxane |
|----------------|-----------------|-------------|
| 1              | -3.19           |             |
| 2              | -4.25           | -4.01       |
| 3              | -4.68           |             |

<sup>a</sup>  $\Delta\delta = \delta_{\text{bound guest}} - \delta_{\text{free guest}}$

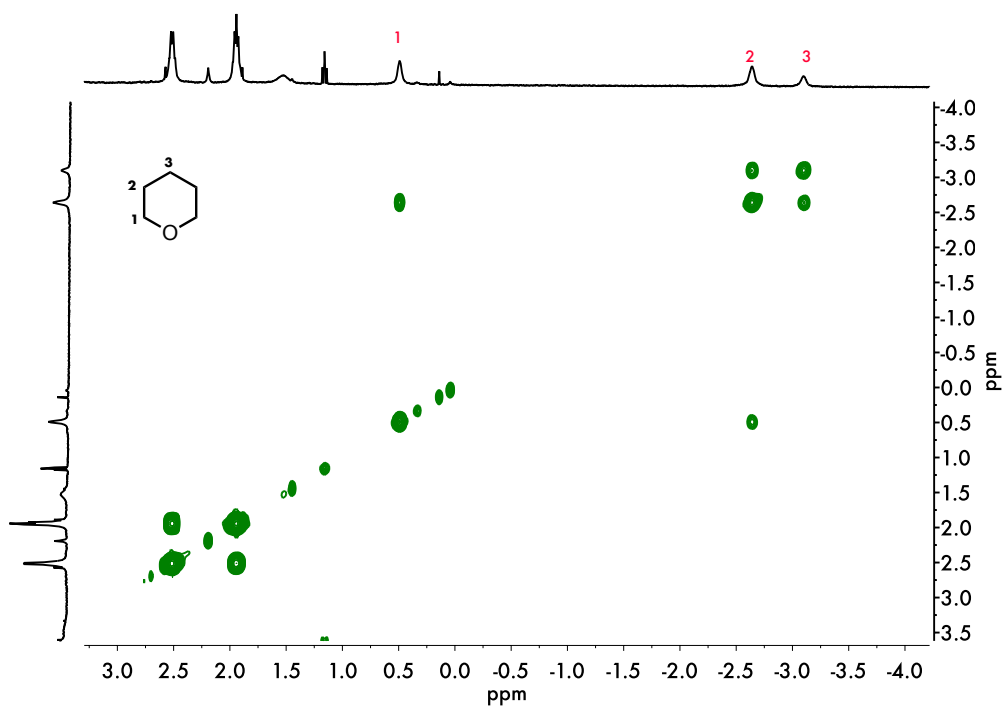

**Figure S26.** Partial COSY NMR spectrum (400 MHz, D<sub>2</sub>O, 298K) of tetrahydropyran in cavitanol **1**.
